# Supplementary material for: Cationic CH⋯π interactions as a function of solvation
Source: Royal Society of Chemistry journal article supplement (doi:10.1039/c6cp06800f), 2016-01-01
Supplement: c6cp06800f1.pdf [file c6cp06800f1.pdf]

Supplementary Information for

**Cationic CH $\cdots\pi$  interactions as a Function of Solvation**

Bright U. Emenike,<sup>\*a</sup> Sara N. Bey,<sup>a</sup> Ronald A. Spinelle,<sup>a</sup> Jacob T. Jones,<sup>a</sup> Barney Yoo,<sup>b</sup>  
and Matthias Zeller<sup>c</sup>

---

<sup>a</sup>Department of Chemistry & Physics, State University of New York, 223 Store Hill Road, Old Westbury, NY 11568, USA. E-mail: emenikeb@oldwestbury.edu

<sup>b</sup>Department of Chemistry, Hunter College, City University of New York, New York, NY 10065, USA

<sup>c</sup>Department of Chemistry, Purdue University, West Lafayette, IN 47907-2084, USA

---

Table of Contents

|                                                                                                                                         |           |
|-----------------------------------------------------------------------------------------------------------------------------------------|-----------|
| <b>General Experimental</b> .....                                                                                                       | <b>3</b>  |
| <b>Error Analysis:</b> .....                                                                                                            | <b>4</b>  |
| <b>Error Analyses Table</b> .....                                                                                                       | <b>4</b>  |
| <b>Synthesis of Balance 2</b> .....                                                                                                     | <b>5</b>  |
| <b>Synthesis of Balance 1</b> .....                                                                                                     | <b>6</b>  |
| <b>Table S1. Solvent polarity scales, Hunter’s H-bond parameters, and interaction energies determined from balances 1 and 1a.</b> ..... | <b>7</b>  |
| <b>Correlation Plots:</b> .....                                                                                                         | <b>7</b>  |
| <b>Figure S1. Correlation of interaction energies with solvents’ dielectric constant.</b> .....                                         | <b>7</b>  |
| <b>Figure S3. Correlation of interaction energies with solvents’ <math>E_T(30)</math> values.</b> .....                                 | <b>8</b>  |
| <b>Computational Results<sup>4</sup></b> .....                                                                                          | <b>9</b>  |
| <b>The xyz coordinates for the folded conformer of Balance 1 optimized at B3LYP/6-31+G(d)-D3<sup>4</sup></b> .....                      | <b>9</b>  |
| <b>The xyz coordinates for the unfolded conformer of Balance 1 optimized at B3LYP/6-31+G(d)-D3</b> .....                                | <b>10</b> |
| <b>Crystallographic details</b> .....                                                                                                   | <b>13</b> |
| <b>Table S2. Experimental details for X-ray Analysis</b> .....                                                                          | <b>13</b> |
| <b>Figure S1. Ortep representation of 2 (50% probability level) with atom labels and showing disorder of cation.</b> .....              | <b>15</b> |
| <b>Carbon and Proton NMR of Balance 2 precursor</b> .....                                                                               | <b>16</b> |
| <b>Carbon and Proton NMR of Balance 2</b> .....                                                                                         | <b>17</b> |
| <b>Carbon and Proton NMR of Balance 1 precursor</b> .....                                                                               | <b>18</b> |
| <b>Carbon and Proton NMR of Balance 1</b> .....                                                                                         | <b>19</b> |
| <b>Proton and Carbon-13 NMR of balance 3</b> .....                                                                                      | <b>20</b> |
| <b>Proton NMR of Balance 1 in various solvents</b> .....                                                                                | <b>21</b> |
| <b>Proton NMR of balance 1 in acetic acid</b> .....                                                                                     | <b>21</b> |
| <b>Proton NMR of balance 1 in acetone</b> .....                                                                                         | <b>21</b> |
| <b>Proton NMR of balance 1 in acetonitrile</b> .....                                                                                    | <b>22</b> |
| <b>Proton NMR of balance 1 in DMF</b> .....                                                                                             | <b>22</b> |
| <b>Proton NMR of balance 1 in DMSO</b> .....                                                                                            | <b>23</b> |
| <b>Proton NMR of balance 1 in Methanol</b> .....                                                                                        | <b>23</b> |
| <b>Proton NMR of balance 1 in nitromethane</b> .....                                                                                    | <b>24</b> |
| <b>Proton NMR of balance 1 in Pyridine</b> .....                                                                                        | <b>24</b> |
| <b>MS Spectrum for Balances 1 and 1a</b> .....                                                                                          | <b>25</b> |
| <b>References</b> .....                                                                                                                 | <b>26</b> |

## General Experimental

All reactions were carried out under an atmosphere of nitrogen in oven-dried glassware with magnetic stirring unless otherwise indicated. Reagents were purchased from commercial sources and used without further purification. Solvents for chemical reaction were dried. Purification of the reaction products was carried out by flash chromatography using silica gel 40-63  $\mu\text{m}$  (230-400 mesh) unless otherwise stated. Reactions were monitored by  $^1\text{H}$  NMR and/or thin layer chromatography. Visualization was accomplished with UV light, staining with 5%  $\text{KMnO}_4$  followed by heating or with p-anisaldehyde in EtOH solution. NMR was recorded using a 400 MHz Bruker spectrometer. Chemical shifts were recorded in ppm ( $\delta$ ) using tetramethylsilane (C, H) as the internal reference. Data are reported as (s = singlet, d = doublet, t = triplet, q = quartet, m = multiplet; integration; coupling constant(s) in Hz). Melting points were measured with a Gallenkamp melting point apparatus.

### Measurement of interaction energies ( $\Delta G$ ) and error analysis

The *folded/unfolded* ratios were measured by proton NMR spectra at room temperature ( $\sim 25^\circ\text{C}$ ). The peak areas corresponding to the *ortho* methyl proton in the *folded* and *unfolded* states were integrated. The CH- $\pi$  interaction energies were estimated from the equation:  $\Delta G = -RT\ln K = -RT\ln[\textit{folded}]/[\textit{unfolded}]$ .

### Error Analysis:

The error in the folding energies was estimated systematically by including a 3% error in the relative integral of the smaller peak of the two conformer peaks. e.g. relative integrals of 0.1 to 1, would be 0.13 to 1 at one extreme and 0.07 to 1 at the other extreme with a 3% error applied. These max and min integrations are applied in the computation of the  $\Delta G$  to determine the upper and lower limit of the conformational free energies. This approach ensures that small errors are associated with  $\Delta G$ s that are close to zero.

Multiple-linear regression was performed with *Statplus* program

**Error Analyses Table**

| Solvents     | Balance <b>1</b> (%) |        | 3% Error Limits (Unfolded) |       | $\Delta G$ (with 3% errors) kcal/mol |       |
|--------------|----------------------|--------|----------------------------|-------|--------------------------------------|-------|
|              | Unfolded             | Folded | upper                      | lower | upper                                | lower |
| DMSO         | 9                    | 91     | 12                         | 6     | -1.21                                | -1.58 |
| Pyridine     | 14                   | 86     | 17                         | 11    | -0.97                                | -1.19 |
| DMF          | 15                   | 85     | 18                         | 12    | -0.93                                | -1.14 |
| Acetone      | 16                   | 84     | 19                         | 13    | -0.89                                | -1.08 |
| Acetonitrile | 18                   | 82     | 20                         | 16    | -0.82                                | -0.98 |
| Nitromethane | 21                   | 79     | 23                         | 19    | -0.72                                | -0.85 |
| Methanol     | 21                   | 79     | 23                         | 19    | -0.72                                | -0.85 |
| Acetic acid  | 25                   | 75     | 27                         | 23    | -0.60                                | -0.71 |

|              | Balance <b>1a</b> (%) |        | 3% Error Limits (Unfolded) |       | $\Delta G$ (with 3% errors) kcal/mol |       |
|--------------|-----------------------|--------|----------------------------|-------|--------------------------------------|-------|
|              | Unfolded              | Folded | upper                      | lower | upper                                | lower |
| DMSO         | 31                    | 69     | 33                         | 29    | -0.44                                | -0.51 |
| Pyridine     | 33                    | 67     | 35                         | 31    | -0.38                                | -0.46 |
| DMF          | 34                    | 66     | 36                         | 32    | -0.36                                | -0.43 |
| Acetone      | 35                    | 65     | 37                         | 33    | -0.33                                | -0.40 |
| Acetonitrile | 35                    | 65     | 37                         | 33    | -0.33                                | -0.40 |
| Nitromethane | 35                    | 65     | 37                         | 33    | -0.33                                | -0.40 |
| Methanol     | 36                    | 64     | 38                         | 34    | -0.31                                | -0.37 |
| Acetic acid  | 40                    | 60     | 42                         | 38    | -0.21                                | -0.27 |

## Synthesis of Balance 2

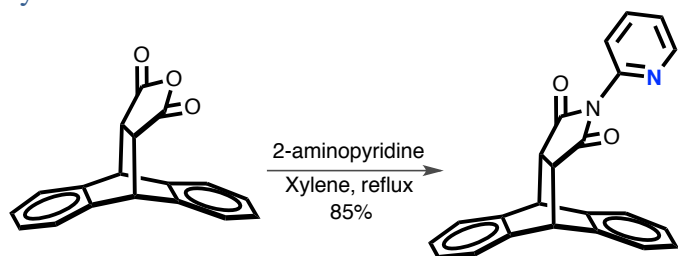

*Procedure:* Anhydride (350 mg, 1.27 mmol) and 2-aminopyridine (143 mg, 1.52 mmol) dissolved in ~4 ml xylene was refluxed for 3 days (monitored by NMR) after which the volume of xylene was reduced and the crude product purified by column chromatography to yield 380 mg (85%) of the imide product.

Proton NMR (400 MHz, DMSO-d<sub>6</sub>):  $\delta$  3.50 (s, 2H), 4.89 (s, 2H), 6.03 – 6.05 (d, 1H,  $J$  = 7.6 Hz), 7.18 – 7.83 (m, 11H), 8.48 (d, 1H,  $J$  = 4.8 Hz). Carbon NMR (400 MHz, DMSO-d<sub>6</sub>):  $\delta$  45.3, 47.4, 122.2, 124.9, 125.3, 126.9, 127.2, 139.2, 139.8, 142.1, 146.2, 150.0, 176.0. HRMS calcd for C<sub>23</sub>H<sub>16</sub>N<sub>2</sub>O<sub>2</sub> [M]<sup>+</sup> found 352.1213

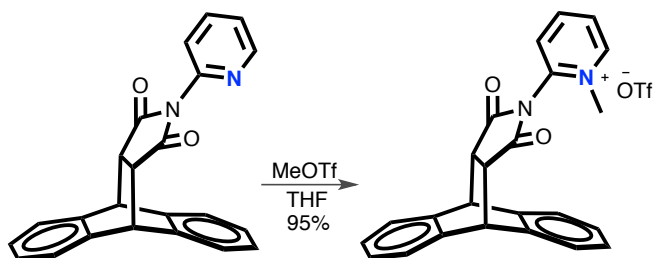

*Procedure:* Imide (100 mg, 0.28 mmol) was dissolved in 2 ml (1:1) THF-acetonitrile. After cooling for 5 mins using ice-water bath, MeOTf (460 mg, 2.8 mmol) in 1 ml THF was added dropwise and the reaction was stirred at room temperature. TLC indicated reaction completion after just 15 mins and the reaction was concentrated to a minimum volume and the crude product was purified by column chromatography with EtOAc-Methanol. Yield = 140 mg, 95%. Proton NMR (400 MHz, DMSO-d<sub>6</sub>):  $\delta$  2.91 and 4.15 (s, 3H), 3.70 – 3.75 (s, 2H), 4.93 (s, 2H), 5.91 and 8.08 (d, 1H,  $J$  = 8.0 Hz), 7.10 – 7.63 (m, 8H), 7.45 (t, 1H), 8.63 and 8.74 (t, 1H), 9.00 and 9.14 (d, 1H,  $d$  = 6 Hz). Carbon NMR (400 MHz, acetone-d<sub>6</sub>):  $\delta$  43.3, 45.2, 45.3, 48.3, 48.5, 119.6, 122.8, 124.5, 124.6, 125.2, 125.5, 126.8, 126.9, 127.5, 128.8, 129.0, 139.6, 140.1, 141.2, 141.7, 141.8, 148.4, 148.5, 148.6, 149.1, 174.4, 174.5. HRMS calcd for C<sub>24</sub>H<sub>19</sub>N<sub>2</sub>O<sub>2</sub> [M]<sup>+</sup> found 367.1442.

## Synthesis of Balance 1

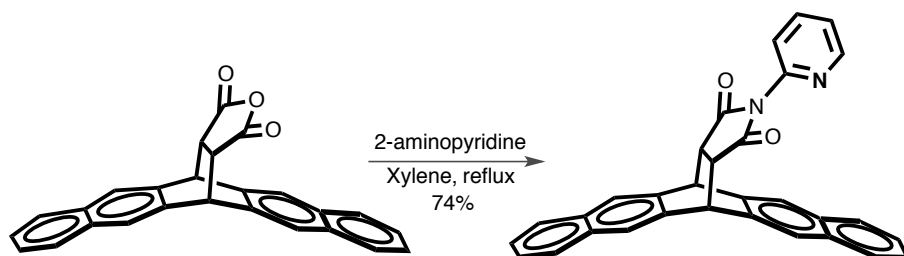

*Procedure:* Anhydride (165 mg, 0.44 mmol) and 2-aminopyridine (49 mg, 0.53 mmol) dissolved in ~2 ml xylene was refluxed for 3 days after which the volume of xylene was reduced and the crude product purified by column chromatography to yield 147mg (74%) of the imide product.

Proton NMR (400 MHz,  $\text{CDCl}_3$ ):  $\delta$  3.61 (s, 2H), 5.17 (s, 2H), 5.72 (d, 1H,  $J = 8$  Hz), 7.16 (m, 1H), 7.37 – 7.50 (m, 5H), 7.52 – 7.87 (m, 7H), 8.50 (d, 1H). Carbon NMR (400 MHz,  $\text{CDCl}_3$ ):  $\delta$  45.6, 47.3, 121.6, 122.7, 123.0, 124.0, 125.5, 126.2, 126.3, 127.6, 127.8, 128.1, 132.6, 135.8, 138.1, 138.4, 145.6, 149.6, 175.7. HRMS calcd for  $\text{C}_{31}\text{H}_{20}\text{N}_2\text{O}_2$   $[\text{M}+\text{H}]^+$  453.1598 found 453.1601

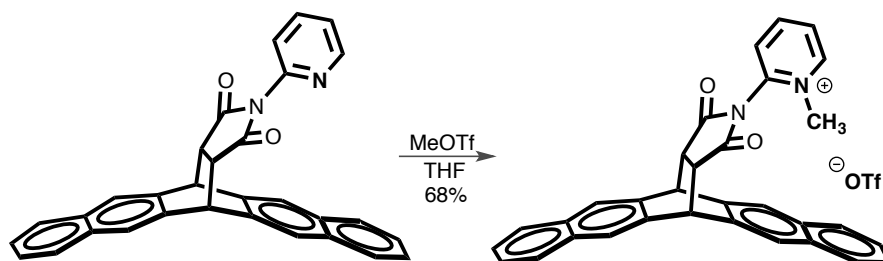

*Procedure:* Imide (150 mg, 0.33 mmol) was dissolved in 5 ml (1:1) THF-acetonitrile. After cooling for 5 mins using ice-water bath, MeOTf (542 mg, 3.3 mmol) in 1 ml THF was added dropwise and the reaction was stirred at room temperature. TLC indicated reaction completion after just 20 mins and the product was purified by column chromatography. Yield = 139 mg, 68%. Proton NMR (400 MHz,  $\text{DMSO-d}_6$ ):  $\delta$  2.34 and 4.19 (s, 3H), 3.82 (s, 2H), 5.25 (s, 2H), 7.55 (m, 4H), 7.93 – 8.29 (m, 10H), 8.85 – 9.13 (m, 2H). Carbon NMR (400 MHz, acetone- $\text{d}_6$ ):  $\delta$  42.7, 45.2, 45.3, 45.5, 48.2, 48.2, 123.2, 123.9, 124.1, 126.2, 126.7, 126.7, 127.7, 127.8, 128.7, 129.0, 132.8, 136.9, 138.3, 146.6, 174.4 HRMS calcd for  $\text{C}_{32}\text{H}_{23}\text{N}_2\text{O}_2$   $[\text{M}]^+$  467.1754 found 467.1764.

Table S1. Solvent polarity scales, Hunter's H-bond parameters, and interaction energies determined from balances 1 and 1a.

| solvents     | $\alpha_s$ $\beta_s$ |           | $\epsilon$ | $\mu$ | $E_T(30)$ | % Folded  |          | $\Delta G$ (kcal/mol) |          |
|--------------|----------------------|-----------|------------|-------|-----------|-----------|----------|-----------------------|----------|
|              | $\alpha_s$           | $\beta_s$ |            |       |           | <b>1a</b> | <b>1</b> | <b>1a</b>             | <b>1</b> |
| DMSO         | 0.8                  | 8.9       | 47.0       | 3.9   | 45.1      | 69        | 91       | -0.47                 | -1.37    |
| Pyridine     | 1.2                  | 7.2       | 12.3       | 2.4   | 40.5      | 67        | 86       | -0.42                 | -1.07    |
| DMF          | 2.9                  | 8.3       | 36.7       | 3.9   | 41.8      | 66        | 85       | -0.39                 | -1.03    |
| Acetone      | 1.5                  | 5.7       | 20.7       | 1.7   | 51.7      | 65        | 84       | -0.37                 | -0.98    |
| Acetonitrile | 1.7                  | 5.1       | 36.6       | 3.5   | 45.6      | 65        | 82       | -0.37                 | -0.90    |
| Nitromethane | 1.8                  | 3.7       | 35.9       | 3.5   | 46.3      | 65        | 79       | -0.37                 | -0.78    |
| Methanol     | 2.7                  | 5.3       | 32.6       | 1.7   | 55.4      | 64        | 79       | -0.34                 | -0.78    |
| Acetic acid  | 3.7                  | 4.9       | 6.2        | 1.7   | 51.7      | 60        | 75       | -0.24                 | -0.65    |

Symbols:  $\epsilon$  = dielectric constant;  $\mu$  = dipole moment in Debye unit;  $E_T(30)$  = Reichardt's solvent polarity in kcal/mol;<sup>2</sup>  $\alpha$  and  $\beta$  are Hunter's solvation parameters.<sup>3</sup>

Correlation Plots:

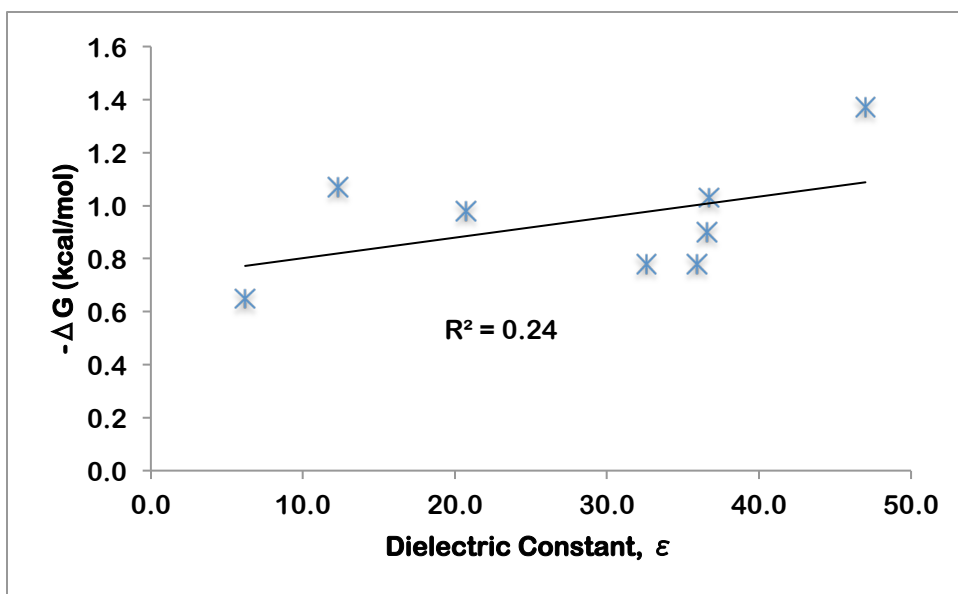

Figure S1. Correlation of interaction energies with solvents' dielectric constant.

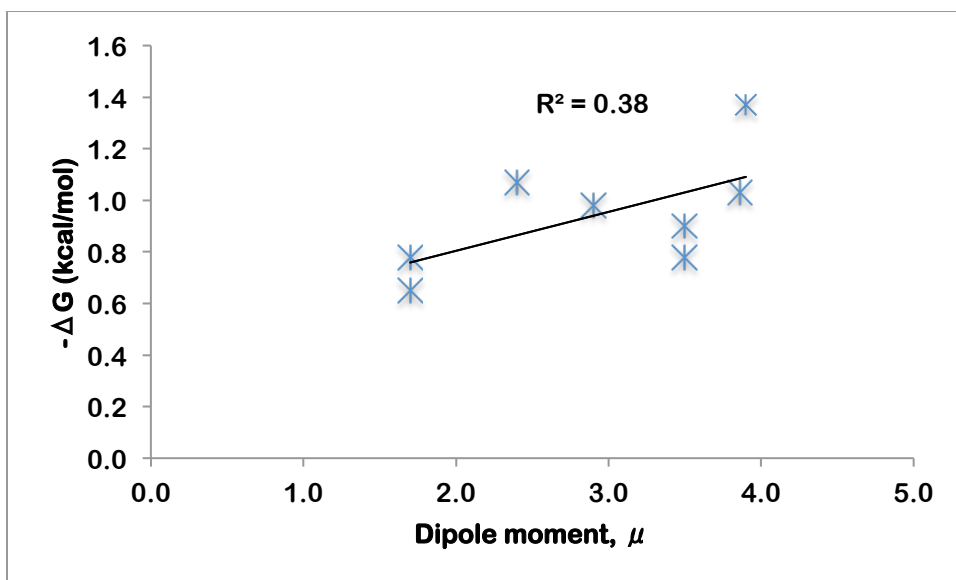

Figure S2. Correlation of interaction energies with solvents' dipole moment.

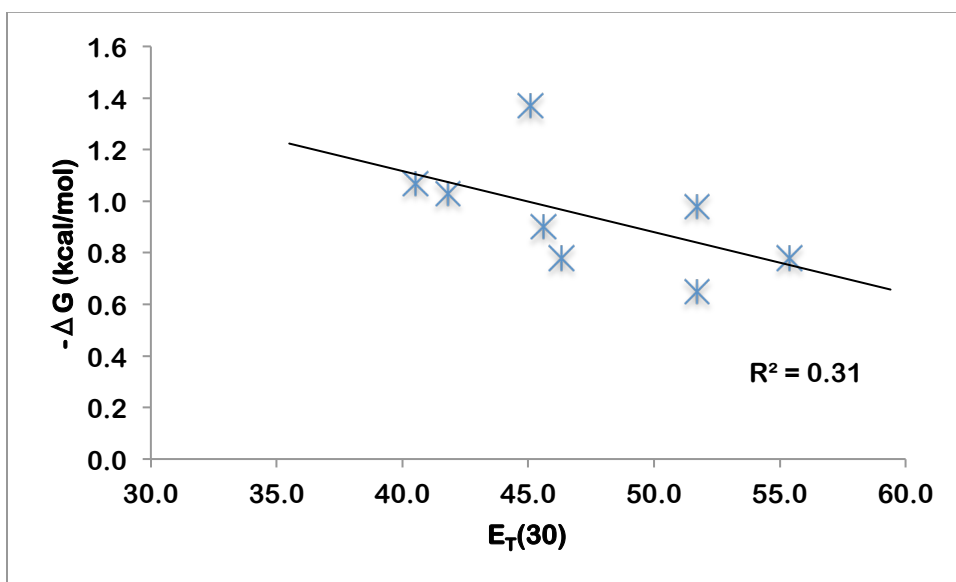

Figure S3. Correlation of interaction energies with solvents'  $E_T(30)$  values.



#### Computational Results<sup>4</sup>

The xyz coordinates for the folded conformer of Balance 1 optimized at B3LYP/6-31+G(d)-D3<sup>4</sup>

|   |          |          |          |
|---|----------|----------|----------|
| H | -3.02056 | 5.4821   | 1.57605  |
| C | -2.47141 | 4.74869  | 0.99287  |
| H | -1.84351 | 3.6252   | 2.70917  |
| C | -1.81555 | 3.71384  | 1.62596  |
| C | -1.71988 | 3.9527   | -1.17129 |
| C | -1.08575 | 2.75114  | 0.87936  |
| C | -2.42323 | 4.86917  | -0.41796 |
| C | -1.03625 | 2.87359  | -0.55031 |
| C | -0.41108 | 1.66342  | 1.50776  |
| H | -2.93538 | 5.69425  | -0.90446 |
| H | -0.29669 | 1.98149  | -2.38986 |
| H | -1.67228 | 4.0502   | -2.25326 |
| C | 0.27385  | 0.74334  | 0.75211  |
| H | -0.43925 | 1.57746  | 2.59181  |
| C | 0.3051   | 0.85526  | -0.67158 |
| C | -0.32603 | 1.89625  | -1.30561 |
| C | 1.04314  | -0.45552 | 1.2734   |
| H | 1.03831  | -0.51732 | 2.36348  |
| C | 1.05867  | -0.27875 | -1.3375  |
| C | 0.3811   | -1.73742 | 0.65156  |
| H | 0.93779  | -2.61672 | 0.9867   |
| C | 0.34364  | -1.60439 | -0.89309 |
| H | 0.8177   | -2.45305 | -1.39521 |
| C | -1.05785 | -1.88502 | 1.09253  |
| C | -1.12579 | -1.59172 | -1.26622 |
| O | -1.5049  | -2.07    | 2.19804  |
| O | -1.63789 | -1.4769  | -2.35527 |
| N | -1.87788 | -1.73296 | -0.06642 |
| C | -3.27043 | -1.85278 | -0.01946 |
| C | -6.02968 | -2.01603 | 0.02564  |
| C | -3.88037 | -3.03085 | 0.39389  |
| N | -4.02841 | -0.77202 | -0.36049 |
| C | -5.38079 | -0.8574  | -0.3593  |
| C | -5.26927 | -3.11788 | 0.42378  |
| H | -3.25074 | -3.86464 | 0.67915  |
| H | -5.91085 | 0.03537  | -0.66638 |
| H | -5.75143 | -4.03675 | 0.74135  |

|   |          |          |          |
|---|----------|----------|----------|
| H | -7.11325 | -2.04374 | 0.01828  |
| H | -4.14051 | 1.29838  | -0.69221 |
| C | -3.38111 | 0.51887  | -0.70466 |
| H | -2.62089 | 0.73914  | 0.04266  |
| H | -2.92552 | 0.43947  | -1.69084 |
| C | 2.44148  | -0.40823 | 0.68787  |
| H | 3.61266  | -0.50865 | 2.4793   |
| C | 3.61739  | -0.44953 | 1.39294  |
| C | 3.63463  | -0.29189 | -1.4272  |
| C | 4.86535  | -0.40833 | 0.70682  |
| C | 2.44979  | -0.32734 | -0.73638 |
| C | 4.87404  | -0.32985 | -0.72574 |
| C | 6.10301  | -0.44249 | 1.40046  |
| H | 6.12533  | -0.22965 | -2.48929 |
| H | 3.64345  | -0.22778 | -2.51327 |
| C | 7.29728  | -0.40194 | 0.71273  |
| H | 6.09478  | -0.50001 | 2.48603  |
| H | 8.23798  | -0.42821 | 1.2549   |
| C | 7.30594  | -0.32515 | -0.70126 |
| H | 8.25323  | -0.29334 | -1.23152 |
| C | 6.1202   | -0.28978 | -1.40384 |
| H | 1.06532  | -0.19699 | -2.42609 |

**The xyz coordinates for the unfolded conformer of Balance 1 optimized at B3LYP/6-31+G(d)-D3.**

|   |          |         |          |
|---|----------|---------|----------|
| H | -3.59295 | 5.19523 | 0.86092  |
| C | -2.97641 | 4.43732 | 0.38623  |
| H | -2.06961 | 3.80176 | 2.2243   |
| C | -2.12698 | 3.66186 | 1.14758  |
| C | -2.25057 | 3.31394 | -1.63729 |
| C | -1.30593 | 2.67344 | 0.54115  |
| C | -3.03814 | 4.26211 | -1.01869 |
| C | -1.37065 | 2.49415 | -0.88164 |
| C | -0.45202 | 1.82927 | 1.30908  |
| H | -3.70219 | 4.88675 | -1.60917 |
| H | -0.62642 | 1.34343 | -2.56863 |
| H | -2.29011 | 3.18456 | -2.71606 |
| C | 0.30026  | 0.86054 | 0.69161  |
| H | -0.42057 | 1.9476  | 2.38983  |
| C | 0.24748  | 0.69123 | -0.72535 |
| C | -0.57094 | 1.48457 | -1.49158 |

|   |          |          |          |
|---|----------|----------|----------|
| C | 1.15964  | -0.1811  | 1.38066  |
| H | 1.18774  | -0.05249 | 2.46422  |
| C | 1.08865  | -0.47149 | -1.21732 |
| C | 0.50895  | -1.56982 | 1.01604  |
| H | 1.04108  | -2.36825 | 1.53973  |
| C | 0.49894  | -1.7591  | -0.52355 |
| H | 1.06324  | -2.63479 | -0.85378 |
| C | -0.94729 | -1.56404 | 1.43735  |
| C | -0.95468 | -1.90958 | -0.91376 |
| O | -1.42658 | -1.41136 | 2.53346  |
| O | -1.43748 | -2.09177 | -2.00811 |
| N | -1.73847 | -1.73881 | 0.25971  |
| C | -3.09519 | -1.39793 | 0.21317  |
| C | -5.77229 | -0.75813 | 0.00079  |
| C | -3.51283 | -0.10592 | 0.5063   |
| N | -3.99889 | -2.3499  | -0.14993 |
| C | -5.31299 | -2.03408 | -0.26811 |
| C | -4.86053 | 0.22244  | 0.40134  |
| H | -2.76693 | 0.62798  | 0.78576  |
| H | -5.96779 | -2.83772 | -0.5805  |
| H | -5.18726 | 1.23583  | 0.61153  |
| H | -6.82979 | -0.54476 | -0.10517 |
| H | -4.43658 | -4.37781 | -0.45767 |
| C | -3.55561 | -3.73906 | -0.42247 |
| H | -3.02486 | -3.76105 | -1.37506 |
| H | -2.8989  | -4.0621  | 0.38569  |
| C | 2.53258  | -0.17197 | 0.74376  |
| H | 3.76179  | 0.07784  | 2.48135  |
| C | 3.73023  | -0.03738 | 1.39995  |
| C | 3.6527   | -0.33136 | -1.40817 |
| C | 4.95182  | -0.03919 | 0.66762  |
| C | 2.49372  | -0.32081 | -0.67372 |
| C | 4.91246  | -0.18752 | -0.75914 |
| C | 6.21005  | 0.10287  | 1.30896  |
| H | 6.10159  | -0.29714 | -2.56469 |
| H | 3.6246   | -0.44317 | -2.49003 |
| C | 7.37821  | 0.09929  | 0.57693  |
| H | 6.23823  | 0.21591  | 2.38983  |
| H | 8.33486  | 0.20957  | 1.07915  |
| C | 7.33935  | -0.04656 | -0.83127 |

|   |         |          |          |
|---|---------|----------|----------|
| H | 8.26655 | -0.04676 | -1.39681 |
| C | 6.13298 | -0.1866  | -1.48365 |
| H | 1.05849 | -0.58283 | -2.3029  |

### Crystallographic details

Diffraction data were collected on a Bruker APEX II CCD diffractometer at 100 K using monochromatic Mo K $\alpha$  radiation with the omega scan technique. Data for torsion balance 2 were collected, its unit cell determined, and the data integrated and corrected for absorption and other systematic errors using the Apex2 suite of programs.[A] The space group was assigned and the structure was solved by direct methods using the SHELXTL suite of programs [B] and refined by full matrix least squares against  $F^2$  with all reflections using Shelxl2014 [C] using the graphical interface Shelxle [D]. H atoms attached to carbon and nitrogen atoms were positioned geometrically and constrained to ride on their parent atoms, with carbon hydrogen bond distances of 0.95 Å for alkene and aromatic C-H, 1.00 and 0.98 Å for aliphatic C-H and CH<sub>3</sub> moieties, respectively. Methyl H atoms were allowed to rotate but not to tip to best fit the experimental electron density.  $U_{\text{iso}}(\text{H})$  values were set to a multiple of  $U_{\text{eq}}(\text{C/N})$  with 1.5 for CH<sub>3</sub> and 1.2 for C-H units, respectively. Large parts of the cation are disordered by a wiggling motion around the central axis of the cation. The two moieties were refined to have similar geometries (SAME command in Shelxl), and  $U_{ij}$  components of ADPs of disordered atoms were restrained to be similar when closer than 1.7 Å (SIMU command in Shelxl). Subject to these restraints the occupancy ratio refined to close to 1:1, 0.505(8) to 0.459(8), indicating correlated disorder with alternating moieties. No indication of obvious lower symmetry (monoclinic, triclinic) was observed (refinement in triclinic with four independent molecules required a disorder model for the cation similar to that used in the orthorhombic model).

The structure was refined as a 2-component inversion twin, Flack parameter 0.06(10).

Complete crystallographic data, in CIF format, have been deposited with the Cambridge Crystallographic Data Centre. **CCDC 1500195** contains the supplementary crystallographic data for this paper. These data can be obtained free of charge from The Cambridge Crystallographic Data Centre via [www.ccdc.cam.ac.uk/data\\_request/cif](http://www.ccdc.cam.ac.uk/data_request/cif).

**Table S2. Experimental details for X-ray Analysis**

|                             |                                                                                                 |
|-----------------------------|-------------------------------------------------------------------------------------------------|
|                             | brt10_0m                                                                                        |
| Crystal data                |                                                                                                 |
| Chemical formula            | C <sub>24</sub> H <sub>19</sub> N <sub>2</sub> O <sub>2</sub> ·CF <sub>3</sub> O <sub>3</sub> S |
| $M_r$                       | 516.48                                                                                          |
| Crystal system, space group | Orthorhombic, $Pna2_1$                                                                          |
| Temperature (K)             | 100                                                                                             |
| $a, b, c$ (Å)               | 27.601 (10), 10.773 (4), 7.699 (3)                                                              |
| $V$ (Å <sup>3</sup> )       | 2289.3 (14)                                                                                     |

|                                                                       |                                                           |
|-----------------------------------------------------------------------|-----------------------------------------------------------|
| Z                                                                     | 4                                                         |
| $F(000)$                                                              | 1064                                                      |
| $D_x$ (Mg m <sup>-3</sup> )                                           | 1.499                                                     |
| Radiation type                                                        | Mo Ka                                                     |
| No. of reflections for cell measurement                               | 8393                                                      |
| q range (°) for cell measurement                                      | 2.4–27.5                                                  |
| m (mm <sup>-1</sup> )                                                 | 0.21                                                      |
| Crystal shape                                                         | Plate                                                     |
| Colour                                                                | Colourless                                                |
| Crystal size (mm)                                                     | 0.25 × 0.20 × 0.09                                        |
| Data collection                                                       |                                                           |
| Diffractometer                                                        | Bruker AXS APEXII CCD diffractometer                      |
| Radiation source                                                      | fine focus sealed tube                                    |
| Monochromator                                                         | Graphite                                                  |
| Scan method                                                           | w and phi scans                                           |
| Absorption correction                                                 | Multi-scan, <i>SADABS2014/3</i> (Bruker, 2014)            |
| $T_{\min}, T_{\max}$                                                  | 0.692, 0.746                                              |
| No. of measured, independent and observed [ $I > 2s(I)$ ] reflections | 41711, 6772, 5413                                         |
| $R_{\text{int}}$                                                      | 0.052                                                     |
| q values (°)                                                          | $q_{\max} = 30.2, q_{\min} = 1.5$                         |
| $(\sin q/l)_{\max}$ (Å <sup>-1</sup> )                                | 0.709                                                     |
| Range of $h, k, l$                                                    | $h = -39\text{®}38, k = -15\text{®}15, l = -10\text{®}10$ |
| Refinement                                                            |                                                           |
| $R[F^2 > 2s(F^2)], wR(F^2), S$                                        | 0.039, 0.091, 1.03                                        |
| No. of reflections                                                    | 6772                                                      |
| No. of parameters                                                     | 511                                                       |
| No. of restraints                                                     | 785                                                       |

|                                                       |                               |
|-------------------------------------------------------|-------------------------------|
| H-atom treatment                                      | H-atom parameters constrained |
| $(D/s)_{\max}$                                        | < 0.001                       |
| $D\rho_{\max}, D\rho_{\min}$ ( $e \text{ \AA}^{-3}$ ) | 0.24, -0.28                   |
| Absolute structure                                    | Refined as an inversion twin. |
| Absolute structure parameter                          | 0.06 (10)                     |

Computer programs: Apex2 v2014.7-1 (Bruker, 2014), SAINT V8.34A (Bruker, 2013), SHELXS97 (Sheldrick, 2008), SHELXL2014/7 (Sheldrick, 2014), SHELXLE Rev714 (Hübschle *et al.*, 2011).

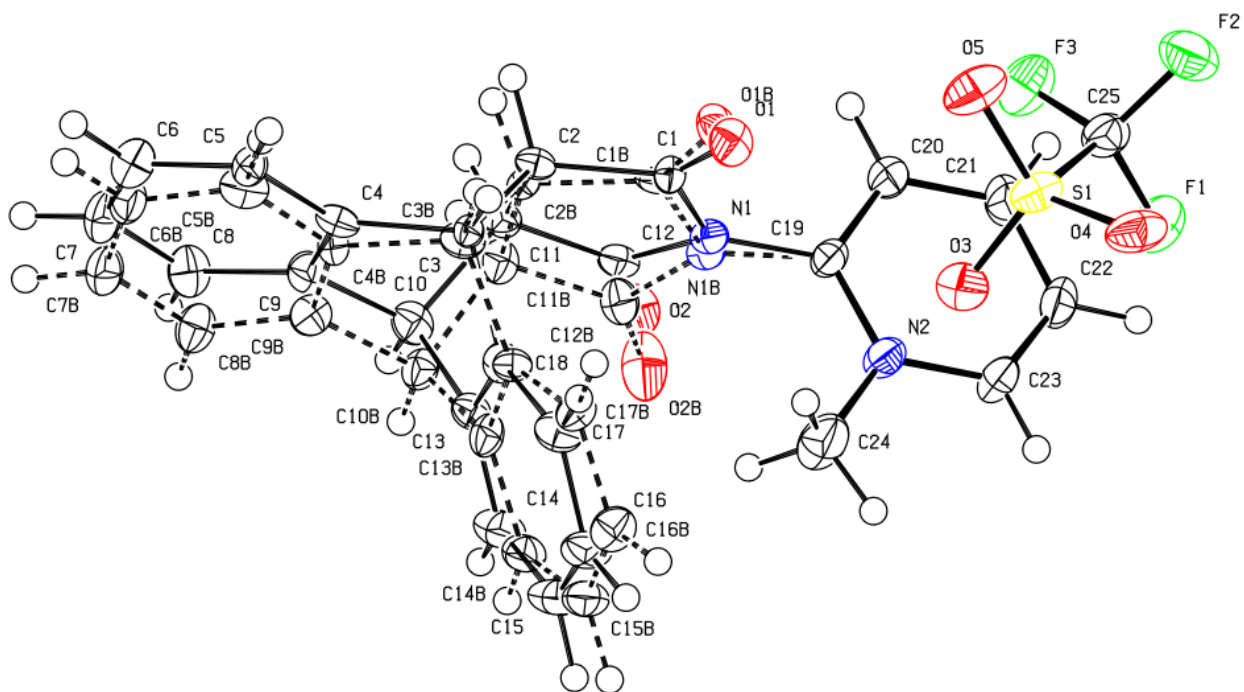

**Figure S1.** Ortep representation of **2** (50% probability level) with atom labels and showing disorder of cation.

# Carbon and Proton NMR of Balance 2 precursor

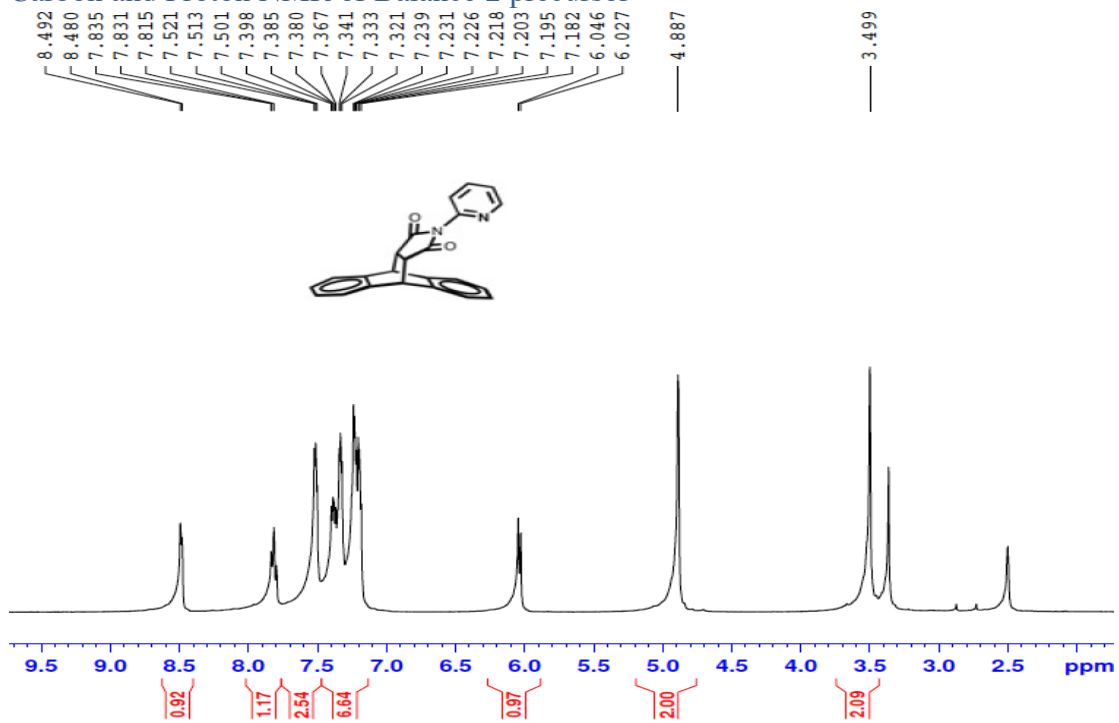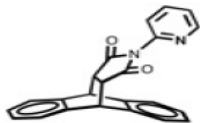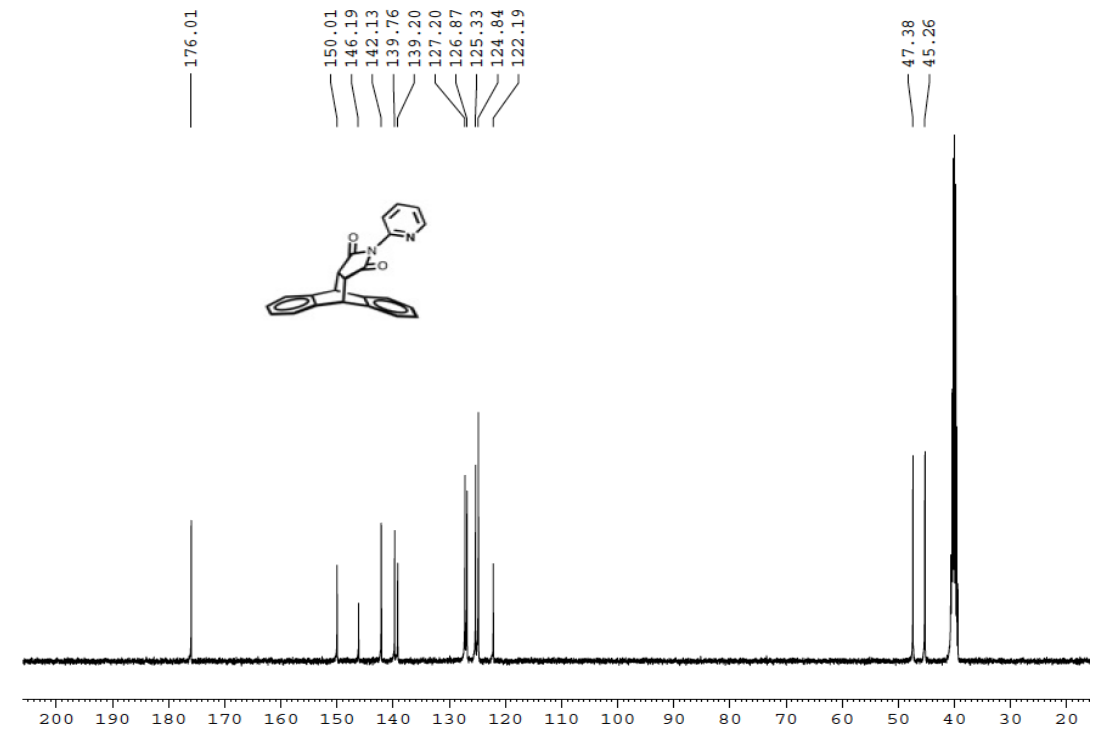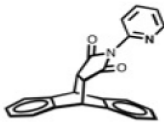



# Carbon and Proton NMR of Balance 2

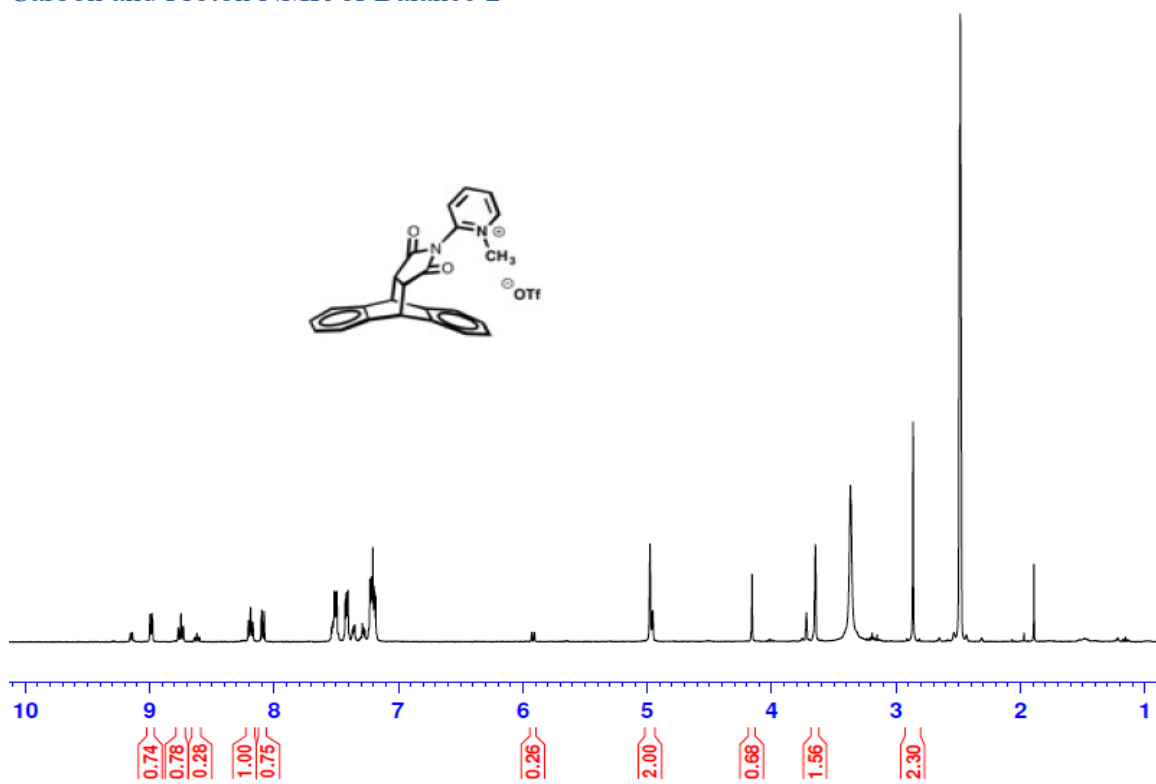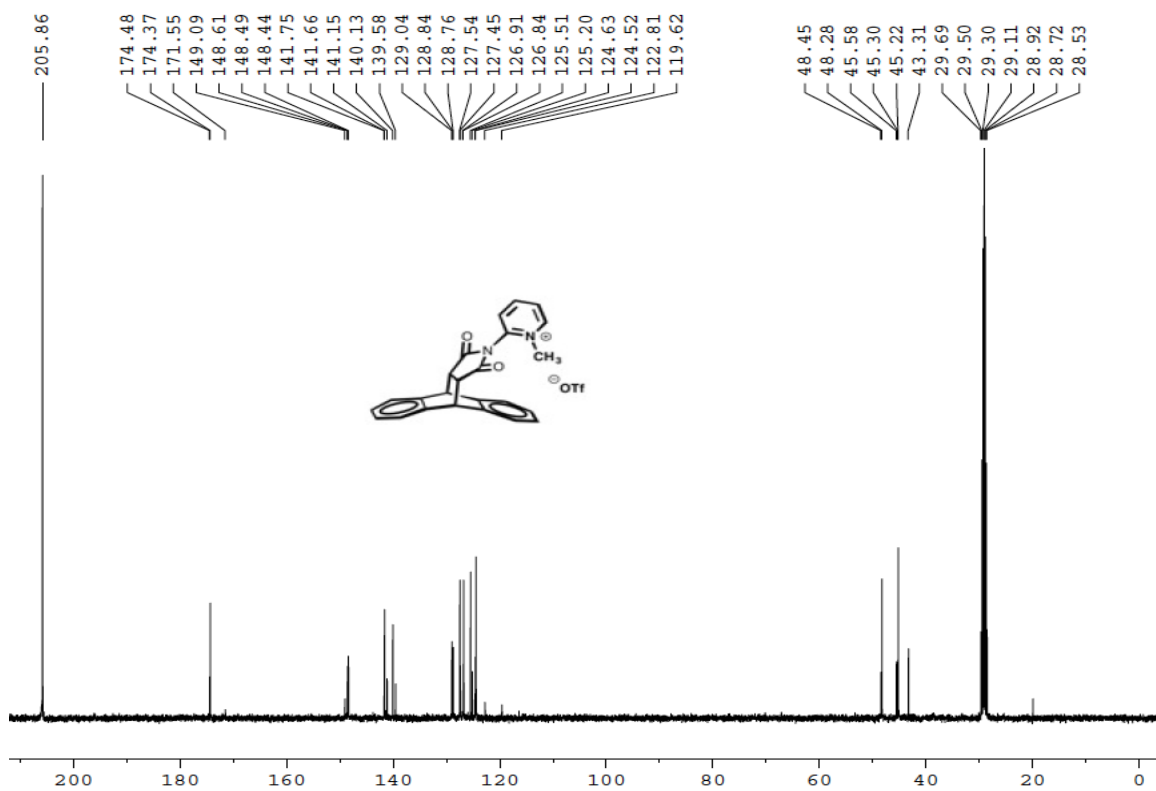

# Carbon and Proton NMR of Balance 1 precursor

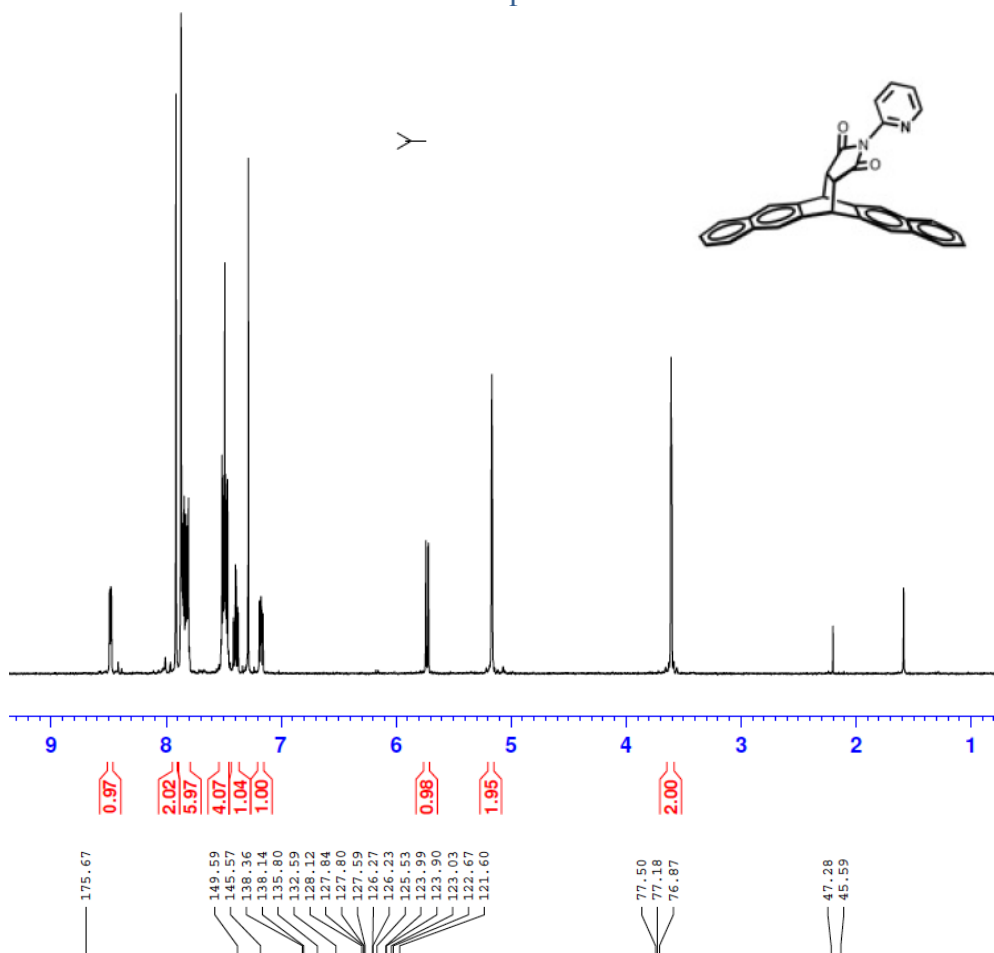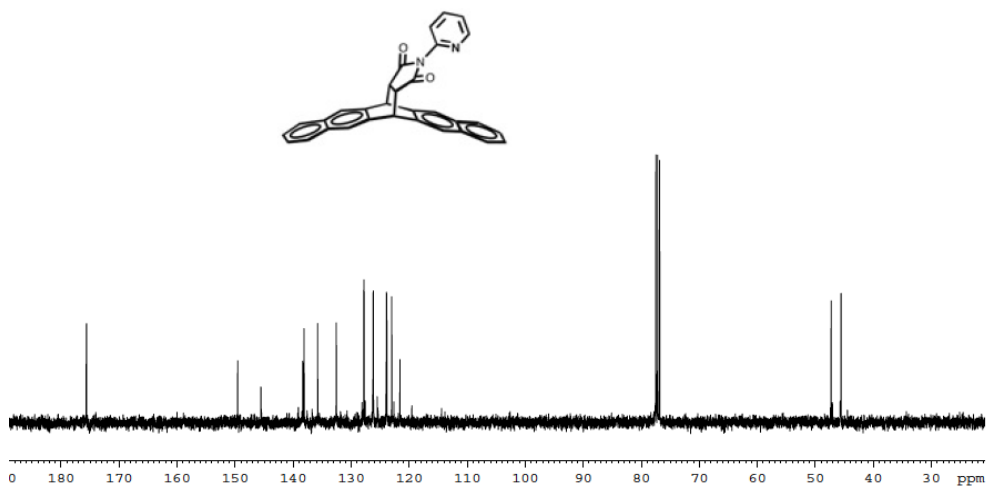

# Carbon and Proton NMR of Balance 1

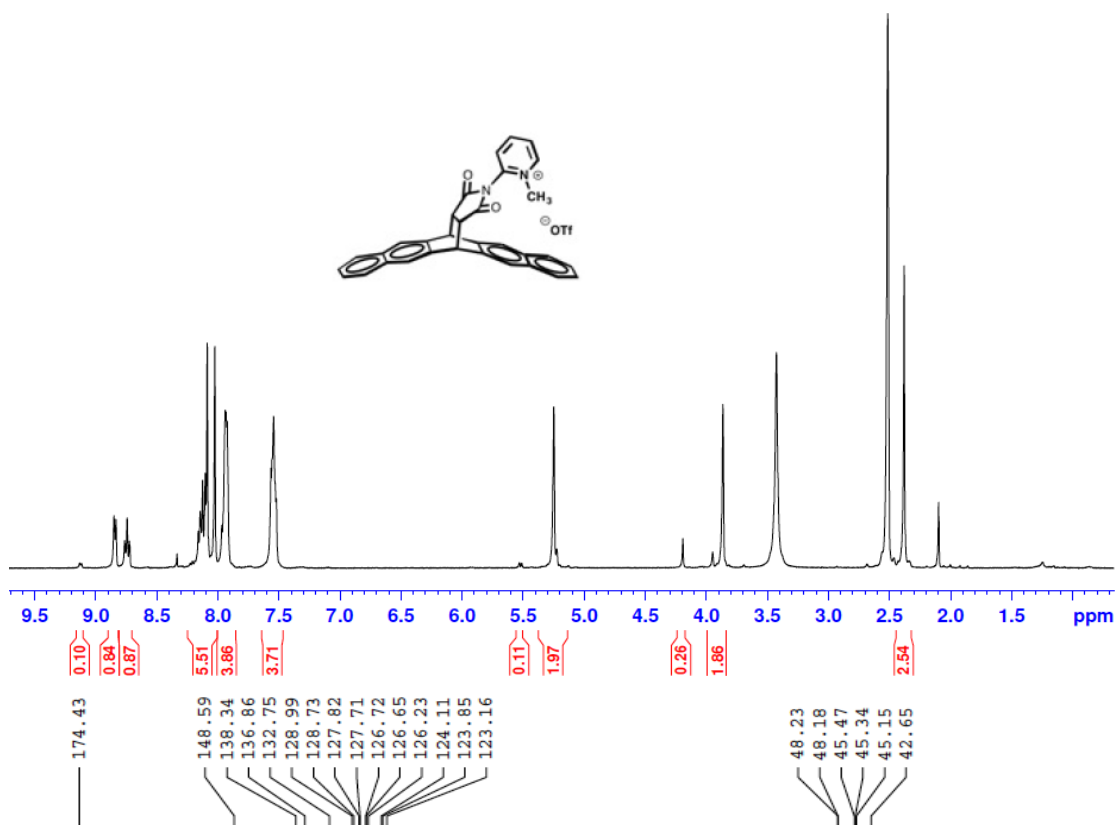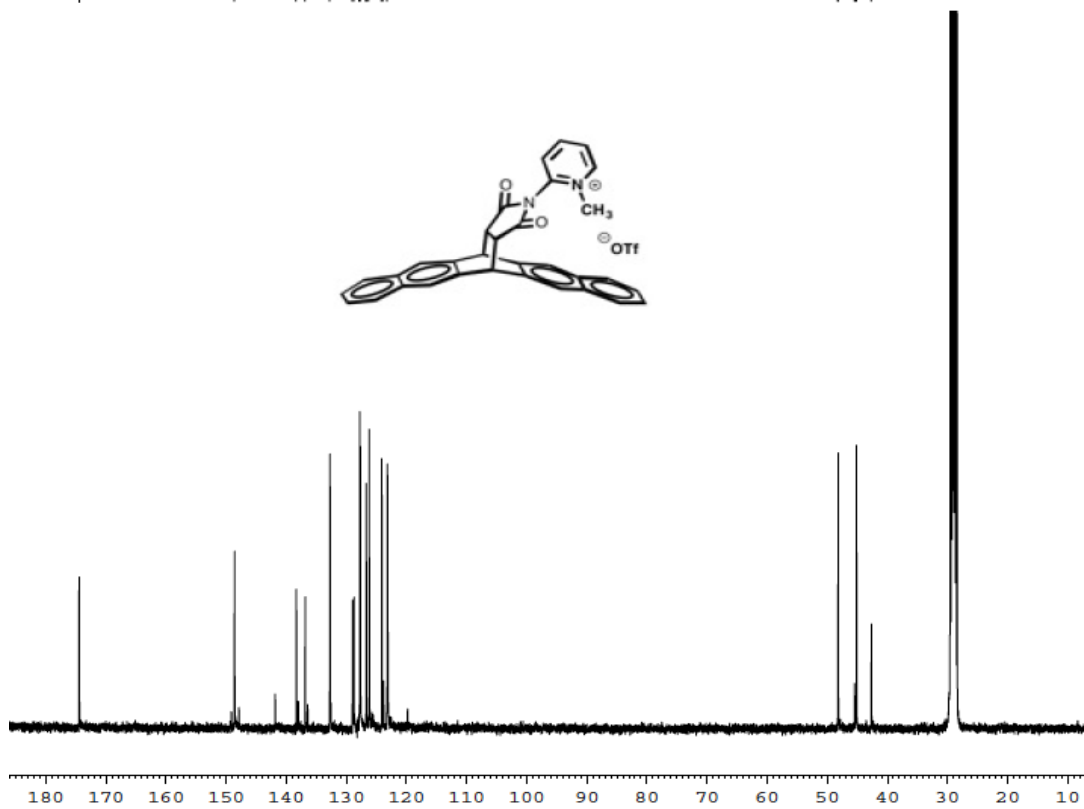

Proton and Carbon-13 NMR of balance 3

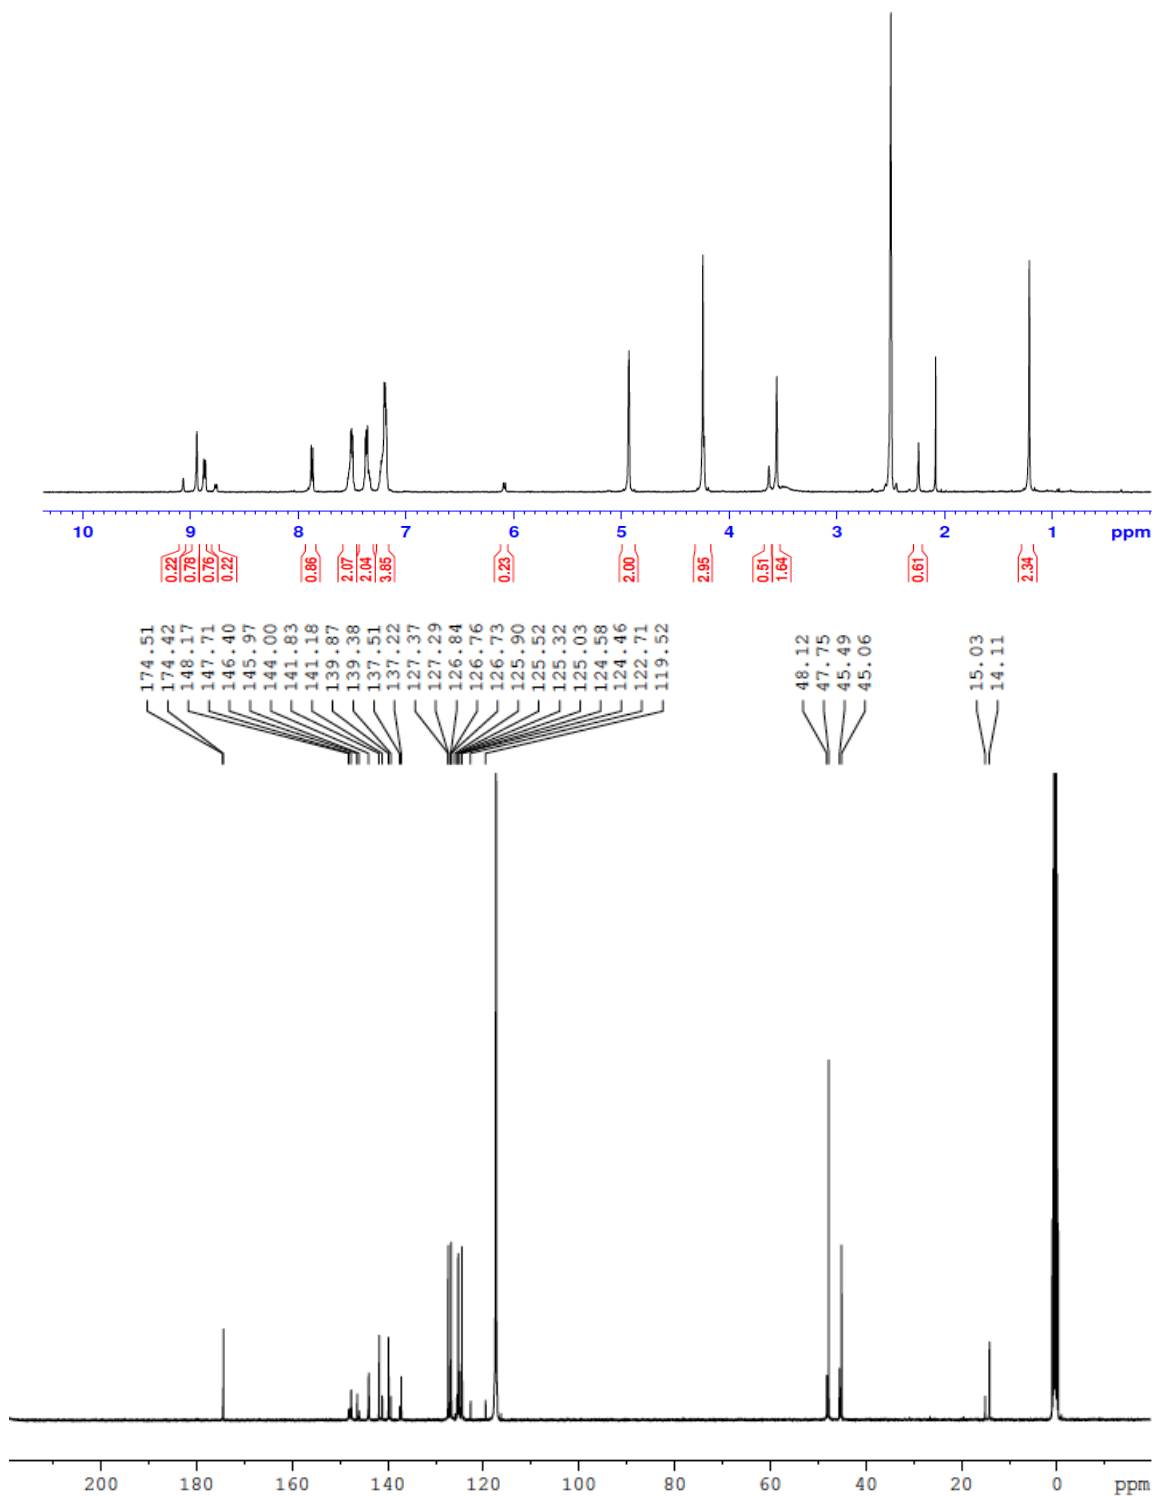

Proton NMR of Balance 1 in various solvents  
**Proton NMR of balance 1 in acetic acid**

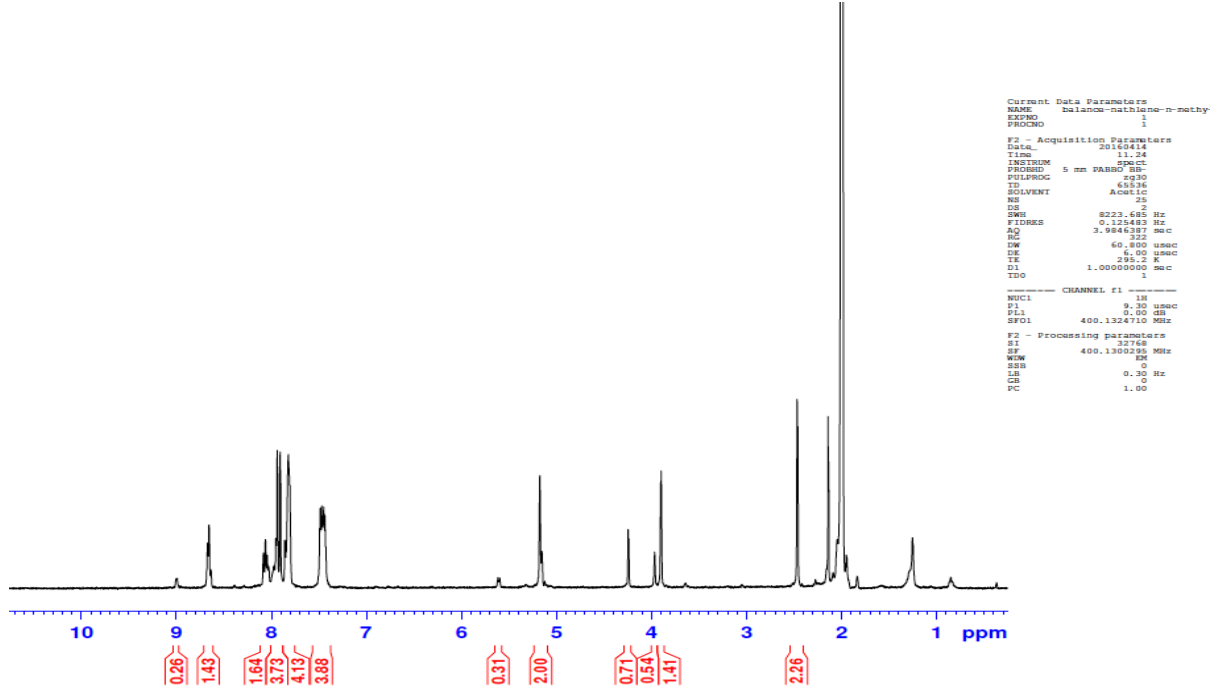

**Proton NMR of balance 1 in acetone**

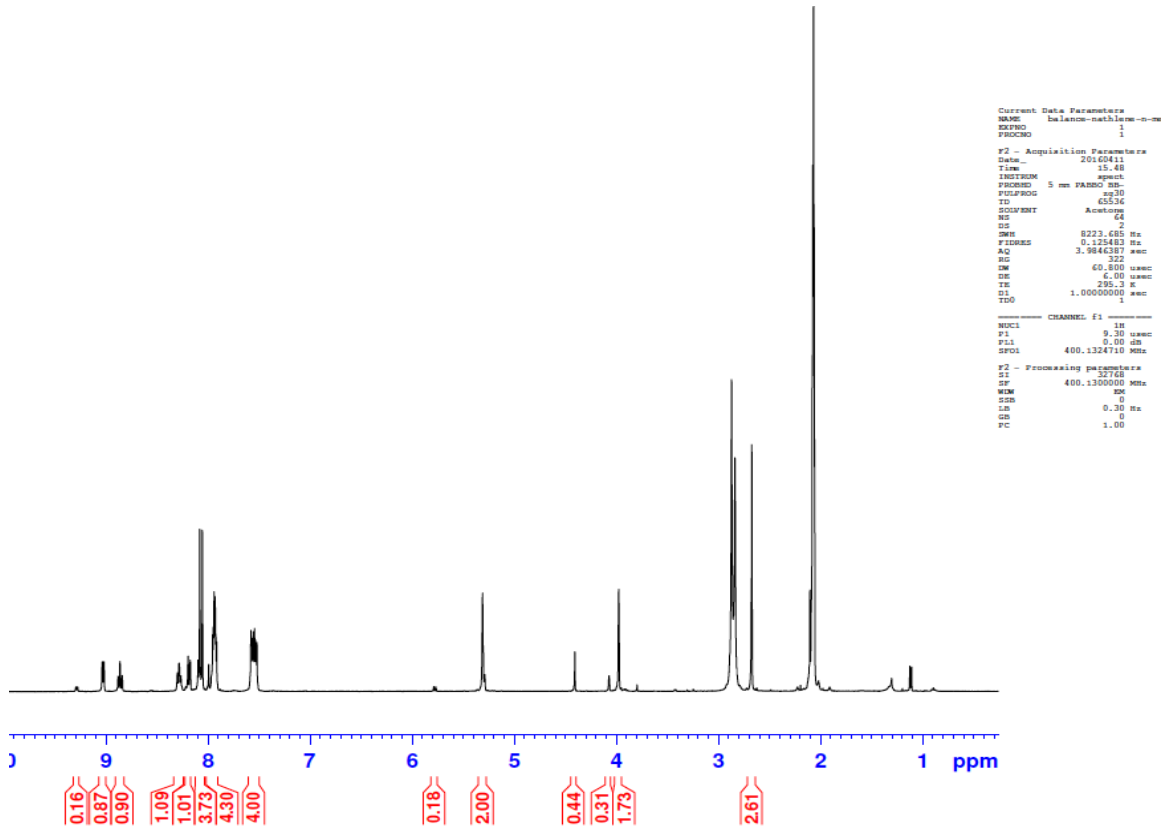

### Proton NMR of balance 1 in acetonitrile

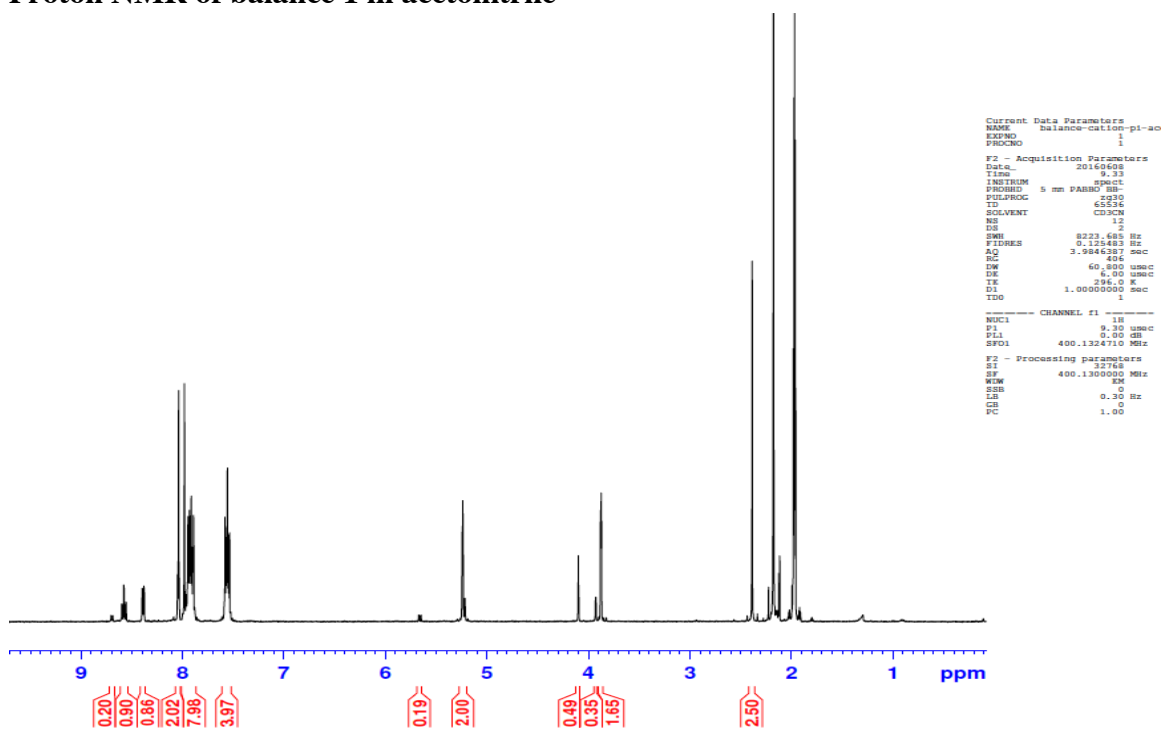

### Proton NMR of balance 1 in DMF

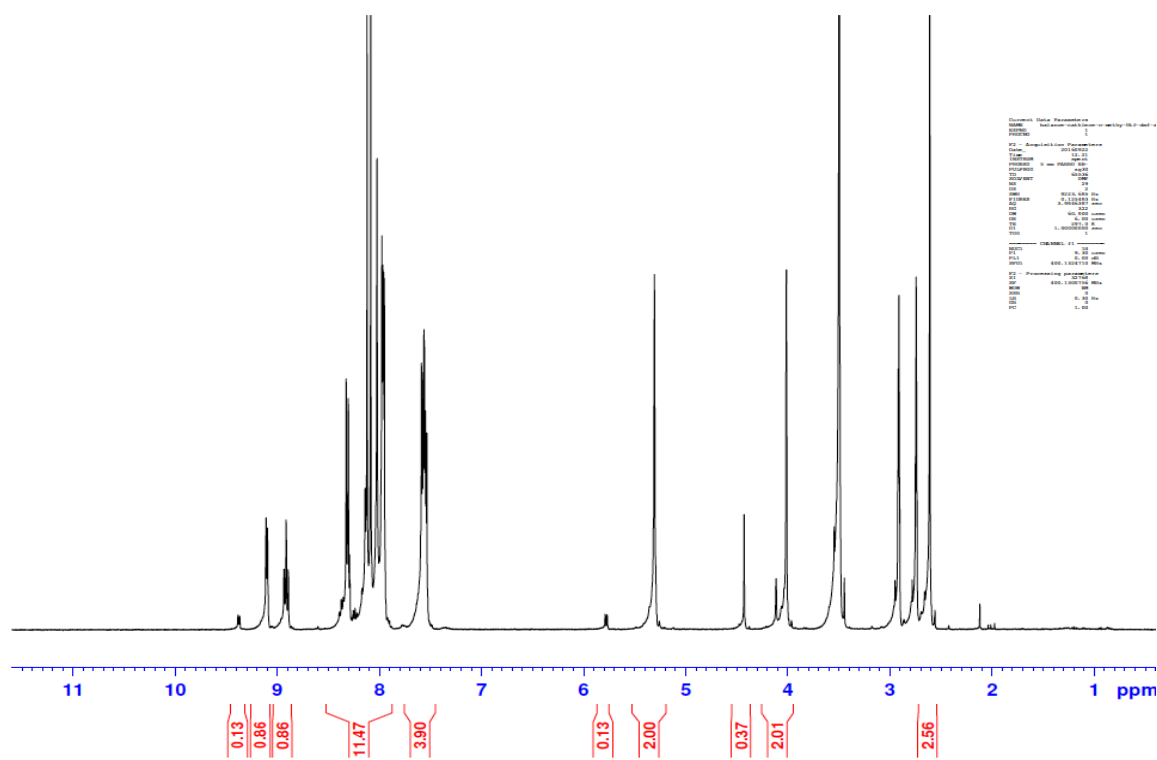

# Proton NMR of balance 1 in DMSO

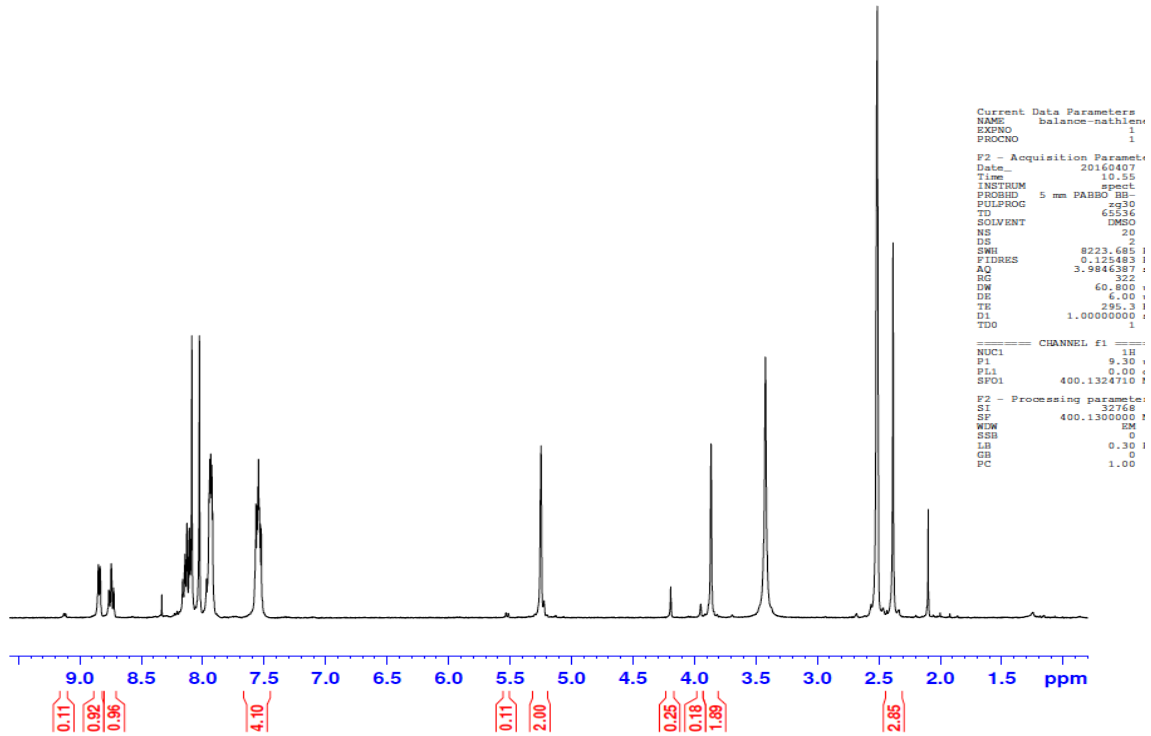

# Proton NMR of balance 1 in Methanol

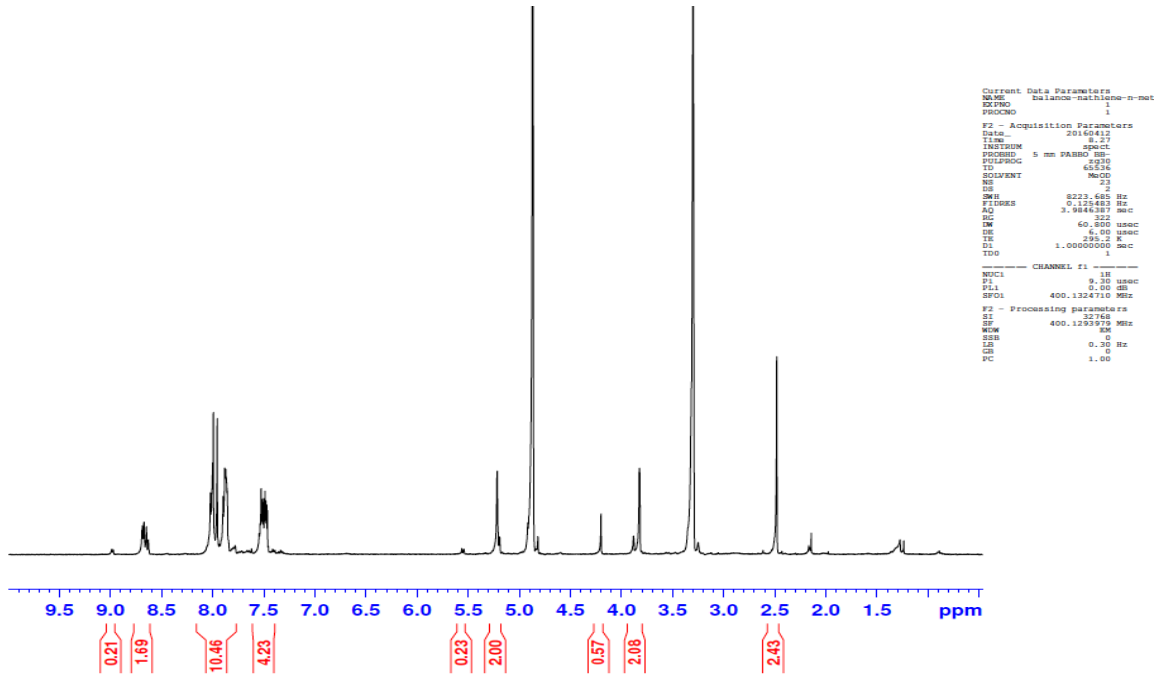

**Proton NMR of balance 1 in nitromethane**

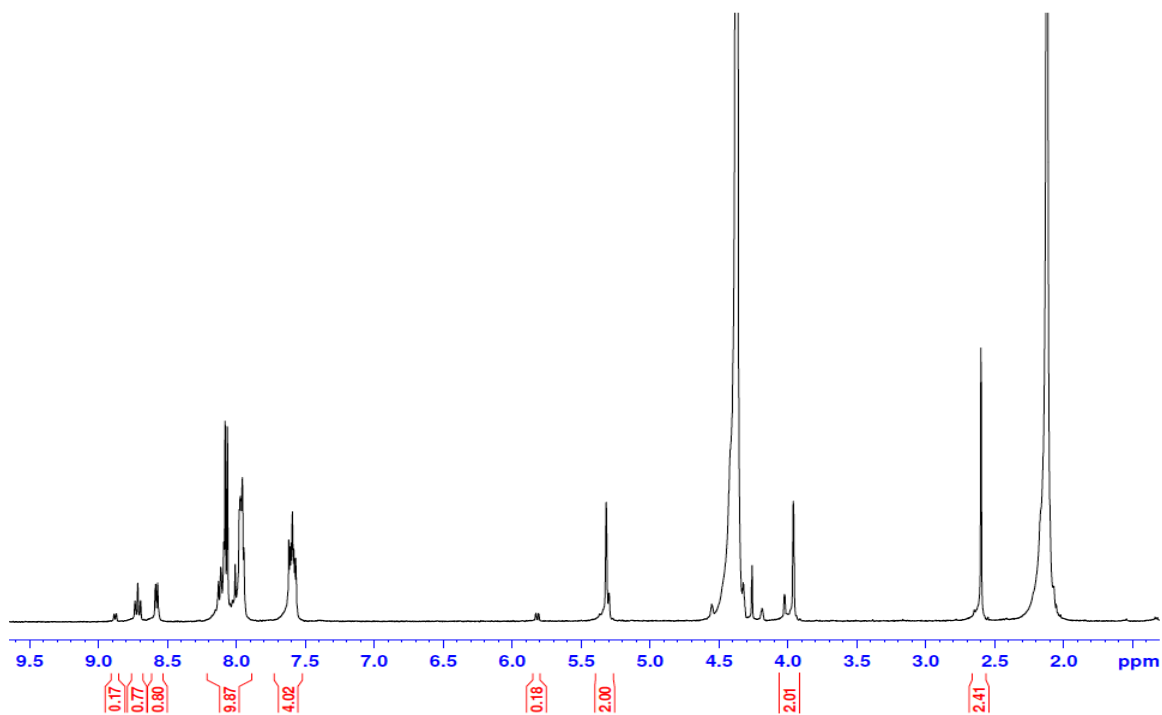

**Proton NMR of balance 1 in Pyridine**

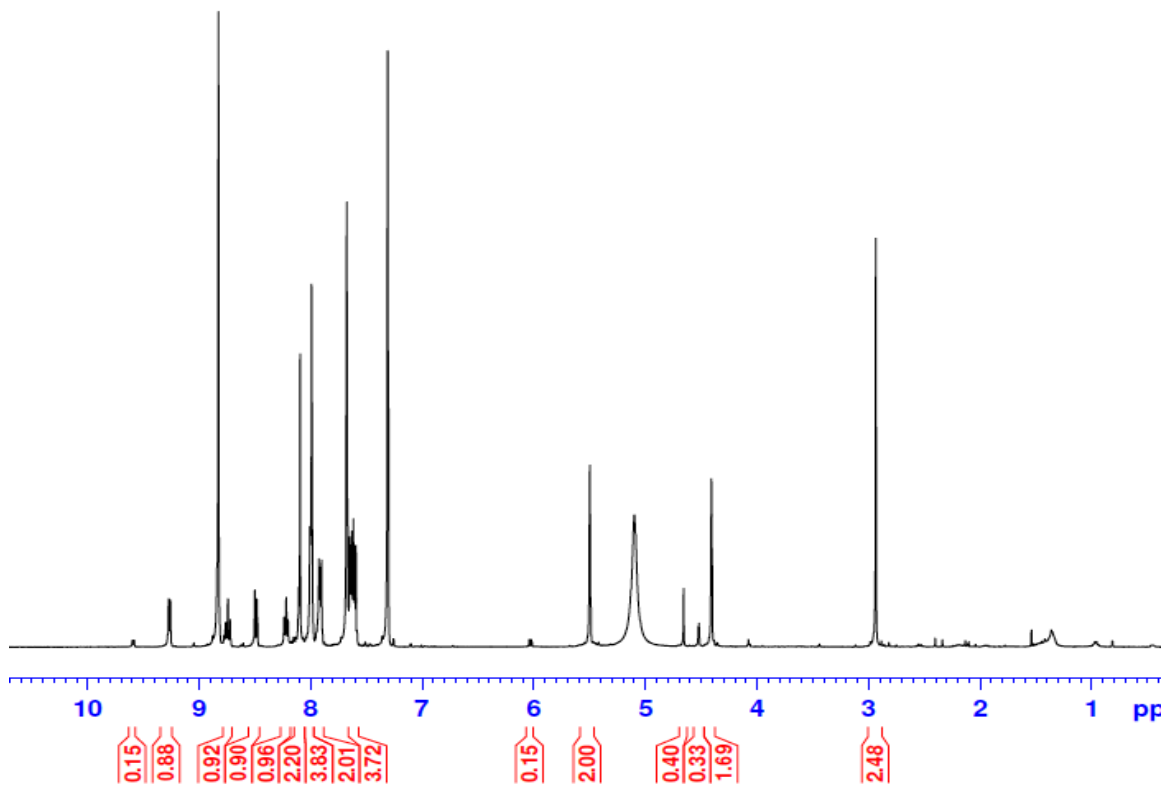



## MS Spectrum for Balances 1 and 1a

### Balance 1

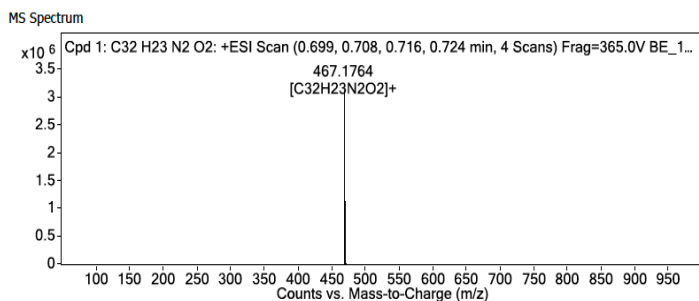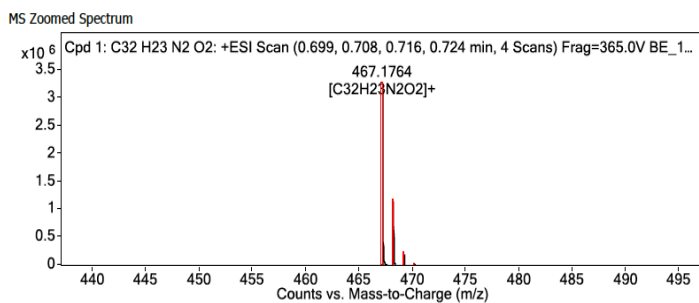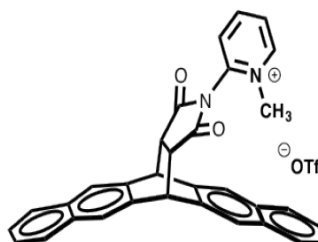

### Balance 1a

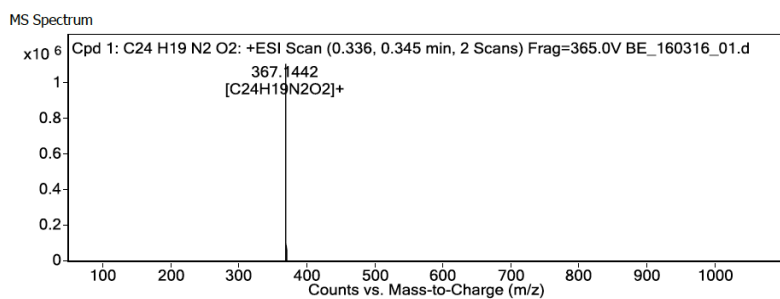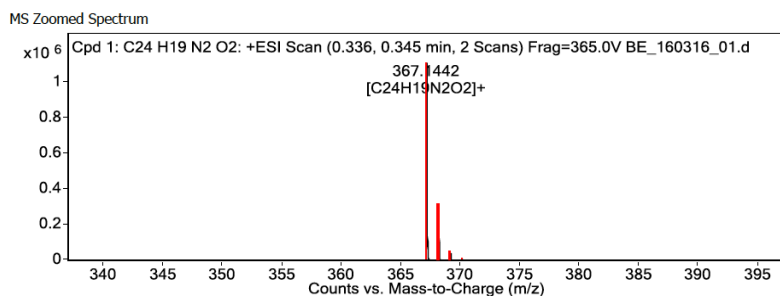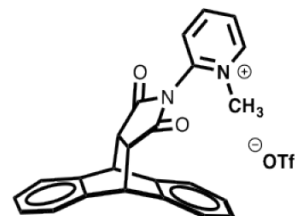

## References

1. M. Bauer, A. Bertario, G. Boccardi, X. Fontaine, R. Rao and D. Verrier, *J. Pharm. Biomed. Anal.*, 1998, **17**, 419-425.
2. C. Reichardt and T. Welton, *solvents and solvent effects in organic chemistry*, Wiley-VCH, 2010.
3. C. A. Hunter, *Angew. Chem., Int. Ed.*, 2004, **43**, 5310.
4. M. J. Frisch, G. W. Trucks and et. al., Gaussian, Inc., Wallingford CT., Editon edn., 2009.
